# Supplementary material for: The Characterization of Non-oncologic Chronic Drug Therapy in Bladder Cancer Patients and the Impact on Recurrence-Free and Cancer-Specific Survival: A Prospective Study
Source: MDPI journal article supplement (doi:10.3390/jcm12216749), 2023-10-25
Supplement: s1 [file s1]

**Table S1.** Univariate analysis (Cox regression model) on the impact of drugs on recurrence free survival (RFS) and cancer specific survival (CSS).

| Drug                             | RFS  |                |         | CSS   |                              |         |
|----------------------------------|------|----------------|---------|-------|------------------------------|---------|
|                                  | HR   | 95% CI         | p value | HR    | 95% CI                       | p value |
| <b>First diagnosis cohort</b>    |      |                |         |       |                              |         |
| Sodium bicarbonate               | 1.06 | 0.29 – 3.80    | 0.931   | 1.08  | 0.12 – 9.75                  | 0.944   |
| Statins                          | 0.14 | 0.02 – 1.06    | 0.057   | 0.53  | 0.06 – 4.77                  | 0.572   |
| Antiplatelet drugs               | 0.23 | 0.03 – 1.72    | 0.150   | 1.00  | 0.11 – 9.06                  | 0.998   |
| Beta-blockers                    | 1.40 | 0.47 – 4.19    | 0.547   | 3.44  | 0.57 – 20.70                 | 0.177   |
| ACE-inhibitors                   | 1.26 | 0.43 – 3.70    | 0.670   | 10.74 | 1.20 – 96.17                 | 0.034   |
| Calcium-channel-blockers         | 0.79 | 0.22 – 2.80    | 0.715   | 2.14  | 0.36 – 12.83                 | 0.405   |
| Angiotensin-receptor-blockers    | 0.62 | 0.17 – 2.19    | 0.454   | 0.54  | 0.06 – 4.91                  | 0.587   |
| Thiazide diuretics               | 1.09 | 0.31 – 7.87    | 0.897   | 3.17  | 0.53 – 19.15                 | 0.208   |
| Vitamin D                        | 0.89 | 0.25 – 3.16    | 0.858   | 2.36  | 0.39 – 14.11                 | 0.348   |
| Allopurinol/ febuxostat          | 0.47 | 0.06 – 3.62    | 0.472   | 2.20  | 0.24 – 19.78                 | 0.482   |
| DOACs                            | 1.45 | 0.46 – 4.56    | 0.525   | 2.38  | 0.40 – 14.28                 | 0.343   |
| Sulfonamides                     | 2.29 | 0.60 – 8.79    | 0.228   | 2.18  | 0.24 – 19.61                 | 0.487   |
| Thyroid hormones                 | 1.08 | 0.30 – 3.82    | 0.910   | 0.04  | 0.00 – 556.42                | 0.499   |
| Proton-pump-inhibitors           | 0.92 | 0.21 – 4.10    | 0.915   | 1.69  | 0.19 – 15.19                 | 0.641   |
| Vitamin B12                      | 2.29 | 0.30 – 17.73   | 0.427   | 0.05  | 0.00 – 3.7 x 10 <sup>6</sup> | 0.741   |
| Alpha-blockers                   | 0.67 | 0.19 – 2.43    | 0.546   | 0.74  | 0.08 – 6.63                  | 0.784   |
| inhalative beta-2-agonists       | 0.05 | 0.00 – 1322.33 | 0.556   | 0.05  | 0.00 – 2.1 x 10 <sup>6</sup> | 0.732   |
| Magnesium                        | 2.90 | 0.80 – 10.46   | 0.104   | 5.28  | 0.88 – 31.59                 | 0.069   |
| inhalative glucocorticoides      | 0.05 | 0.00 – 1322.33 | 0.556   | 0.05  | 0.0 – 2.1 x 10 <sup>6</sup>  | 0.732   |
| <b>Radical cystectomy cohort</b> |      |                |         |       |                              |         |
| Sodium bicarbonate               | 0.58 | 0.23 – 1.50    | 0.264   | 0.42  | 0.11 – 1.61                  | 0.208   |
| Statins                          | 1.52 | 0.57 – 4.03    | 0.399   | 1.23  | 0.33 – 4.55                  | 0.757   |
| Antiplatelet drugs               | 2.26 | 0.91 – 5.64    | 0.080   | 2.23  | 0.68 – 7.35                  | 0.185   |
| Beta-blockers                    | 2.11 | 0.84 – 5.30    | 0.110   | 2.11  | 0.64 – 6.49                  | 0.220   |
| ACE-inhibitors                   | 2.19 | 0.88 – 5.48    | 0.093   | 1.99  | 0.53 – 7.40                  | 0.306   |
| Calcium-channel-blockers         | 2.47 | 0.97 – 6.27    | 0.057   | 2.44  | 0.71 – 8.37                  | 0.157   |
| Angiotensin-receptor-blockers    | 1.07 | 0.38 – 3.02    | 0.894   | 1.41  | 0.35 – 5.63                  | 0.631   |
| Thiazide diuretics               | 2.40 | 0.96 – 5.97    | 0.061   | 1.56  | 0.45 – 5.36                  | 0.480   |
| Vitamin D                        | 1.77 | 0.63 – 4.95    | 0.280   | 1.35  | 0.35 – 5.19                  | 0.659   |
| Allopurinol/ febuxostat          | 0.66 | 0.15 – 2.88    | 0.581   | 1.27  | 0.26 – 6.11                  | 0.769   |
| DOACs                            | 1.55 | 0.45 – 5.38    | 0.489   | 2.02  | 0.42 – 9.77                  | 0.381   |
| Sulfonamides                     | 2.55 | 0.96 – 6.77    | 0.061   | 1.54  | 0.40 – 5.94                  | 0.529   |
| Thyroid hormones                 | 2.18 | 0.78 – 6.14    | 0.139   | 0.04  | 0.00 – 237.44                | 0.469   |
| Proton-pump-inhibitors           | 3.16 | 1.18 – 8.41    | 0.022   | 1.97  | 0.41 – 9.50                  | 0.398   |
| Vitamin B12                      | 0.84 | 0.24 – 2.89    | 0.777   | 0.37  | 0.05 – 2.96                  | 0.351   |
| Alpha-blockers                   | 4.45 | 0.57 – 34.65   | 0.154   | 5.97  | 0.70 – 51.20                 | 0.103   |
| inhalative beta-2-agonists       | 0.58 | 0.13 – 2.55    | 0.468   | 0.04  | 0.00 – 124.35                | 0.430   |
| Magnesium                        | 1.81 | 0.59 – 5.52    | 0.300   | 1.91  | 0.39 – 9.26                  | 0.423   |
| inhalative glucocorticoides      | 0.78 | 0.18 – 3.48    | 0.745   | 0.04  | 0.00 – 358.93                | 0.491   |

HR = hazard ratio; CI = confidence interval.
